# Supplementary material for: Reduction in Obesity-Related Hepatic Fibrosis by SR1664
Source: MDPI journal article supplement (doi:10.3390/biology12101287), 2023-09-26
Supplement: s1 [file s1]

Supplemental Table S1: Gene expression assays

| Gene name                                | Gene symbol     | Assay number  | Probe context sequence    |
|------------------------------------------|-----------------|---------------|---------------------------|
| Beta-2 microglobulin                     | <i>B2m</i>      | Mm00437762_m1 | tctcactgaccggcctgtatgctat |
| Chemokine (C-C) motif ligand 2           | <i>Ccl2</i>     | Mm00441242_m1 | ctcagccagatgcagttaacgcccc |
| Chemokine (C-C) motif ligand 3           | <i>Ccl3</i>     | Mm00441258_m1 | gtcttctcagcgccatatggagctg |
| Interleukin-1b                           | <i>Il1b</i>     | Mm00434228_m1 | gaccccaaaagatgaagggtgctt  |
| Interleukin-6                            | <i>Il6</i>      | Mm00446190_m1 | tgagaaaagagttgtgcaatggcaa |
| Matrix metalloproteinase-2               | <i>Mmp2</i>     | Mm00439506_m1 | ggctgtgttcttcgcagggaatgag |
| Matrix metalloproteinase-3               | <i>Mmp3</i>     | Mm00440295_m1 | gatgtcactggtaccaacatttcc  |
| Matrix metalloproteinase-8               | <i>Mmp8</i>     | Mm00439509_m1 | ctgagaattacctacgaaaattct  |
| Matrix metalloproteinase-9               | <i>Mmp9</i>     | Mm00442991_m1 | tccagtaccaagacaaagcctatt  |
| Matrix metalloproteinase-13              | <i>Mmp13</i>    | Mm00439491_m1 | gcagttccaaaggctacaactgtt  |
| Matrix metalloproteinase-14              | <i>Mmp14</i>    | Mm00485054_m1 | ccccgaagcctggctgcagcagtat |
| Plasminogen-activator inhibitor-1        | <i>Serpine1</i> | Mm00435858_m1 | tcctcctgcctaagttctctctgga |
| TATA-box binding protein                 | <i>Tbp</i>      | Mm01277045_m1 | ttaatctacagaatgatcaaaccag |
| Tissue inhibitor of metalloproteinases-1 | <i>Timp1</i>    | Mm01341361_m1 | ggctgtggggtgtgcacagtgtttc |
| Tissue inhibitor of metalloproteinases-2 | <i>Timp2</i>    | Mm00441825_m1 | tgcaagatcactcgctgtcccatga |
| Tumor necrosis factor- $\alpha$          | <i>Tnfa</i>     | Mm00443258_m1 | cccaaaggatgagaagttccaaa   |
